# Supplementary material
Source: ML conference proceedings conference paper supplement (https://proceedings.mlr.press/v28/busa-fekete13.html)
Supplement: Supplementary file 1 [file busa-fekete13-supp.pdf]

# Supplementary material for “Top-k Selection based on Adaptive Sampling of Noisy Preferences”

## A. Proof of Theorem 1

*Proof.* First, we apply the Hoeffding theorem (Hoeffding, 1963) concerning the sum of random variables to  $\bar{y}_{i,j}$ . Note that  $Y_{i,j}$  is a random variable with support  $[0, 1]$  thus its range is 1. An equivalent formulation of the Hoeffding theorem is as follows: For any  $0 < \delta < 1$ , the interval

$$\left[ \underbrace{\bar{y}_{i,j} - \sqrt{\frac{1}{2n_{i,j}} \log \frac{2}{\delta}}}_{\ell_{i,j}}, \underbrace{\bar{y}_{i,j} + \sqrt{\frac{1}{2n_{i,j}} \log \frac{2}{\delta}}}_{u_{i,j}} \right] \quad (12)$$

contains  $y_{i,j}$  with probability at least  $1 - \delta$ .

According to this, by setting the confidence level to  $\delta/(K^2 n_{\max})$ , for any  $i, j$  and round  $n_{i,j}$ , the probability that  $y_{i,j}$  is not included in  $[\ell_{i,j}, u_{i,j}]$  is at most  $\delta/(K^2 n_{\max})$ . Thus, with probability at least  $1 - \delta$ ,  $y_{i,j} \in [\ell_{i,j}, u_{i,j}]$  for every  $i$  and  $j$  throughout the whole run of the PBR-CO algorithm. Therefore, if the PBR-CO returns an index set  $\hat{I}$  of options and  $n_{i,j} \leq n_{\max}$  for all  $i, j \in [K]$  then  $\hat{I}$  is the solution set of (5) with probability with at least  $1 - \delta$ .

For the expected sample complexity bound, let  $\tilde{n}_{i,j}$  be

$$\left\lceil \frac{1}{2\Delta_{i,j}^2} \log \frac{2K^2 n_{\max}}{\delta} \right\rceil.$$

Based on (12), when for some  $i$  and  $j$ ,  $Y_{i,j}$  is sampled for at least  $\tilde{n}_{i,j}$  times, then  $[\ell_{i,j}, u_{i,j}]$  does not contain  $1/2$  with probability at most  $\delta/(K^2 n_{\max})$  if we assume that  $y_{i,j} \neq 1/2$ , and thus  $\Delta_{i,j} = y_{i,j} - 1/2 \neq 0$ . Furthermore, if for some  $o_i$  all the preferences against other options are decided (i.e.,  $\ell_{i,j} > 1/2$  or  $u_{i,j} < 1/2$  for all  $j$ ), then  $Y_{i,1}, \dots, Y_{i,K}$  will not be sampled any more (see Procedure 2, line 7).

Putting these observations together, the claim follows from the union bound.  $\square$

## B. Proof of Theorem 2

*Proof.* One can get a confidence interval for  $\bar{y}_i = \frac{1}{K-1} \sum_{j \neq i} \bar{y}_{i,j}$  based on the confidence intervals of  $\bar{y}_{j,i}$ . More precisely, put  $c_i = \frac{1}{K-1} \sum_{j \neq i} c_{i,j}$ , and observe that, as  $y_{i,j} \in [y_{i,j} - c_{i,j}, y_{i,j} + c_{i,j}]$  with probability at least  $1 - \delta/(2K^2 n_{\max})$  for any  $1 \leq j \leq K$  in any of the  $n_{\max}$  rounds, the interval

$$\left[ \underbrace{\bar{y}_i - c_i}_{\ell_i}, \underbrace{\bar{y}_i + c_i}_{u_i} \right]$$

contains  $y_i$  with probability at least  $1 - \delta/(2K n_{\max})$  in any round. Therefore, denoting by  $\mathcal{E}$  the event that each  $y_i$  is within the confidence interval of  $\bar{y}_i$  throughout the whole run of algorithm PBR-SE, it holds that  $\mathbf{P}[\mathcal{E}] \geq 1 - \delta/2$ . Also note that whenever  $\mathcal{E}$  holds then  $\bar{y}_i - c_i \leq y_i \leq \bar{y}_j + c_j$  for  $1 \leq i < j \leq K$ , and thus none of  $o_1, \dots, o_{K-\kappa}$  gets selected and none of  $o_{K-\kappa+1}, \dots, o_K$  gets discarded.

If for some  $i \leq K - \kappa$  and  $j \geq K - \kappa + 1$  the number of samples for each of  $y_{i,1}, \dots, y_{i,K}$  and  $y_{j,1}, \dots, y_{j,K}$  is at least  $\left\lceil \left( \frac{4}{y_i - y_j} \right)^2 \log \frac{2K^2 n_{\max}}{\delta} \right\rceil$  then event  $\mathcal{E}$  implies  $\bar{y}_i + c_i < y_i + 2c_i \leq y_j - 2c_j < \bar{y}_j - c_j$  by Hoeffding's bound. Therefore, with probability at least  $1 - \delta$ , after sampling  $y_{i,k}$  at least  $b_i$  times for  $i = 1, \dots, K - \kappa$  and  $k = 1, \dots, K$  and sampling  $y_{j,k}$  at least  $b_j$  times for  $j = K - \kappa + 1, \dots, K$  and  $k = 1, \dots, k$ , algorithm PBR-SE selects  $o_{K-\kappa+1}, \dots, o_K$ , discards  $o_1, \dots, o_{K-\kappa}$ , and thus terminates and returns the optimal solution.  $\square$

### B.1. The pseudo-code of PBR framework regarding the setup described in Section 6

In this setup there are given a set of random variables  $X_1, \dots, X_K$  as input. Each random variable  $X_i$  takes values in a set  $\Omega$  that is a partially ordered by a preference relation  $\preceq$ .

---

**Procedure 5**  $\text{PBR}(X_1, \dots, X_K, \kappa, n_{\max}, \delta)$

---

```

1:  $B = D = \emptyset$  ▷ Set of chosen and discarded options
2:  $A = \{(i, j) \mid 1 \leq i, j \leq K, i \neq j\}$ 
3: for  $i = 1 \rightarrow K$  do
4:    $n_i = 0$ 
5: while  $\forall (n_i \leq n_{\max}) \wedge (|A| > 0)$  do
6:   for all  $i$  appearing in  $A$  do
7:      $x_i^{(n_i)} \sim X_i$ 
8:      $n_i = n_i + 1$  ▷ Draw a random sample
9:   for all  $(i, j) \in A$  do
10:    Update  $\bar{y}_{i,j}$  with the new samples according to (11)
11:     $c_{i,j} = \sqrt{\frac{1}{2 \min(n_i, n_j)}} \log \frac{2K^2 n_{\max}}{\delta}$ 
12:     $u_{i,j} = \bar{y}_{i,j} + c_{i,j}$ ,  $\ell_{i,j} = \bar{y}_{i,j} - c_{i,j}$ 
13: ▷ For the implementation of sampling strategies see Section 4
14:    $(A, B) = \text{SSCO}(A, \bar{\mathbf{Y}}, K, \kappa, \mathbf{U}, \mathbf{L})$  ▷ Sampling strategy for  $\prec^{\text{CO}}$ 
15:    $(A, B, D) = \text{SSSE}(A, \bar{\mathbf{Y}}, K, \kappa, \mathbf{U}, \mathbf{L}, D)$  ▷ Sampling strategy for  $\prec^{\text{SE}}$ 
16:    $(A, B) = \text{SSRW}(\bar{\mathbf{Y}}, K, \kappa, \mathbf{C})$  ▷ Sampling strategy for  $\prec^{\text{RW}}$ 
17: return  $B$ 

```

---
